# Supplementary material for: Progress in the Raman spectra analysis of covalently functionalized multiwalled carbon nanotubes: unraveling disorder in graphitic materials
Source: Royal Society of Chemistry journal article supplement (doi:10.1039/c5cp06519d), 2016-01-01
Supplement: c5cp06519d1.pdf [file c5cp06519d1.pdf]

Electronic Supplementary Information

**Progresses on the Raman Spectra Analysis of Covalently Functionalized Multiwall Carbon  
Nanotubes: Unraveling Disorder on Graphitic Materials**

Susana L. H. Rebelo\*, Alexandra Guedes, Monika E. Szeftczyk,

André M. Pereira, João P. Araújo, Cristina Freire

## Table of contents

|                                                                                                                         |    |
|-------------------------------------------------------------------------------------------------------------------------|----|
| <b>Materials preparation procedures</b> .....                                                                           | 3  |
| <i>Reaction with anilines in the presence of isopentyl nitrite</i> .....                                                | 3  |
| <i>Reaction with anilines in the absence of isopentyl nitrite</i> .....                                                 | 3  |
| <i>Oxidation of MWCNT</i> .....                                                                                         | 3  |
| <i>Reaction in Bingel conditions</i> .....                                                                              | 4  |
| <b>Raman patterns of Raman spectra of materials resulting from reaction of MWCNT with anilines (Figures S1-4)</b> ..... | 5  |
| <b>Examples of Raman bands ratios</b> .....                                                                             | 9  |
| <b>Raman spectra data for functional MWCNT (Tables S1-4)</b> .....                                                      | 10 |

## Materials preparation procedures

### *Reaction with anilines in the presence of isopentyl nitrite*

In a typical reaction,<sup>28</sup> 100 mg of MWCNT are dispersed in DMF (30 mL) with sonication during 10 min. Then ~ 0.12 mol of aniline derivative (about 15 g) is added to the reaction medium under argon, followed by addition of isopentyl nitrite to the reaction, slowly, in a molar ratio to aniline precursor as specified. The reaction mixture is kept under stirring for 48 h at 80 °C; the resulting materials are denoted as Dz\_R[r], where R = CO<sub>2</sub>Et, CO<sub>2</sub>H, OH, I and r = molar ratio of isopentyl nitrite towards aniline.

### *Reaction with anilines in the absence of isopentyl nitrite*

In a typical reaction,<sup>28</sup> 100 mg of MWCNT are dispersed in DMF (30 mL) and 0.12 mol (~ 15 g) of aniline derivative is added to the reaction medium which is kept under stirring in argon atmosphere for 48 h at 80 °C to obtain materials An\_R, where R = CO<sub>2</sub>Et, CO<sub>2</sub>H, OH, I.

### *Oxidation of MWCNT*

The original MWCNT were submitted to three different oxidizing treatments described as follows:<sup>29</sup> i) reflux of HNO<sub>3</sub> 7M for 3 hours (2g/150 mL) to afford material Ox\_h; ii) reflux of HNO<sub>3</sub> 7M for 3 hours (2g/150 mL), with a subsequent thermal treatment in inert atmosphere (100 mL<sub>N</sub> N<sub>2</sub>/min) to 400°C for 1 hour, to afford material Ox\_ht; iii) thermal treatment to 500°C for 3 hours in an 5% O<sub>2</sub>/N<sub>2</sub> atmosphere to afford material Ox-ot.

In all cases, obtained black materials were dispersed in DMF, filtered through 0.2 µm polyamide membrane filters (NL16 Whatman) and purified by reflux in clean DMF for 1 h and filtered again by the previous procedure, extensively washed with DMF and with diethyl ether and finally dried under vacuum at 120 °C overnight.

*Reaction in Bingel conditions*<sup>14</sup>

About 1.2 g of commercial MWCNTs were dispersed in 1 L of toluene, under ultrasonic bath conditions. Then, the diethylbromomalonate (20 mL) and DBU (20 mL) were added to the previous solution and the mixture was allowed to react for 24 h with stirring under reflux and inert atmosphere. Additionally, identical aliquots of diethylbromomalonate and DBU were added and the reaction let to proceed for more 24 h. The resulting material was filtered and rinsed with chloroform and then refluxed twice in DMF during 1 h. Finally, the resulting material was filtered, rinsed with chloroform and dried under vacuum at 100°C during 3 h. This sample was denoted as MWCNT\_B. Subsequently, 1 g of material MWCNT\_B was dispersed in 200 mL of DMF under ultrasonic conditions and 0.5 g of cysteamine were added to the reaction mixture, which was degassed with argon and then 50 mL of 1-methylimidazole was added. The reaction mixture was stirred under reflux in Ar atmosphere for 24 h. The resulting material was filtered under vacuum, rinsed and refluxed twice in clean dichloromethane (200 mL) for 30 min. The resulting material was filtered and rinsed with dichloromethane and dried under vacuum at 80°C, overnight; the material was denoted as MWCNT\_SH.

**Raman patterns of Raman spectra of materials resulting from reaction of MWCNT with anilines (Figures S1-4)**

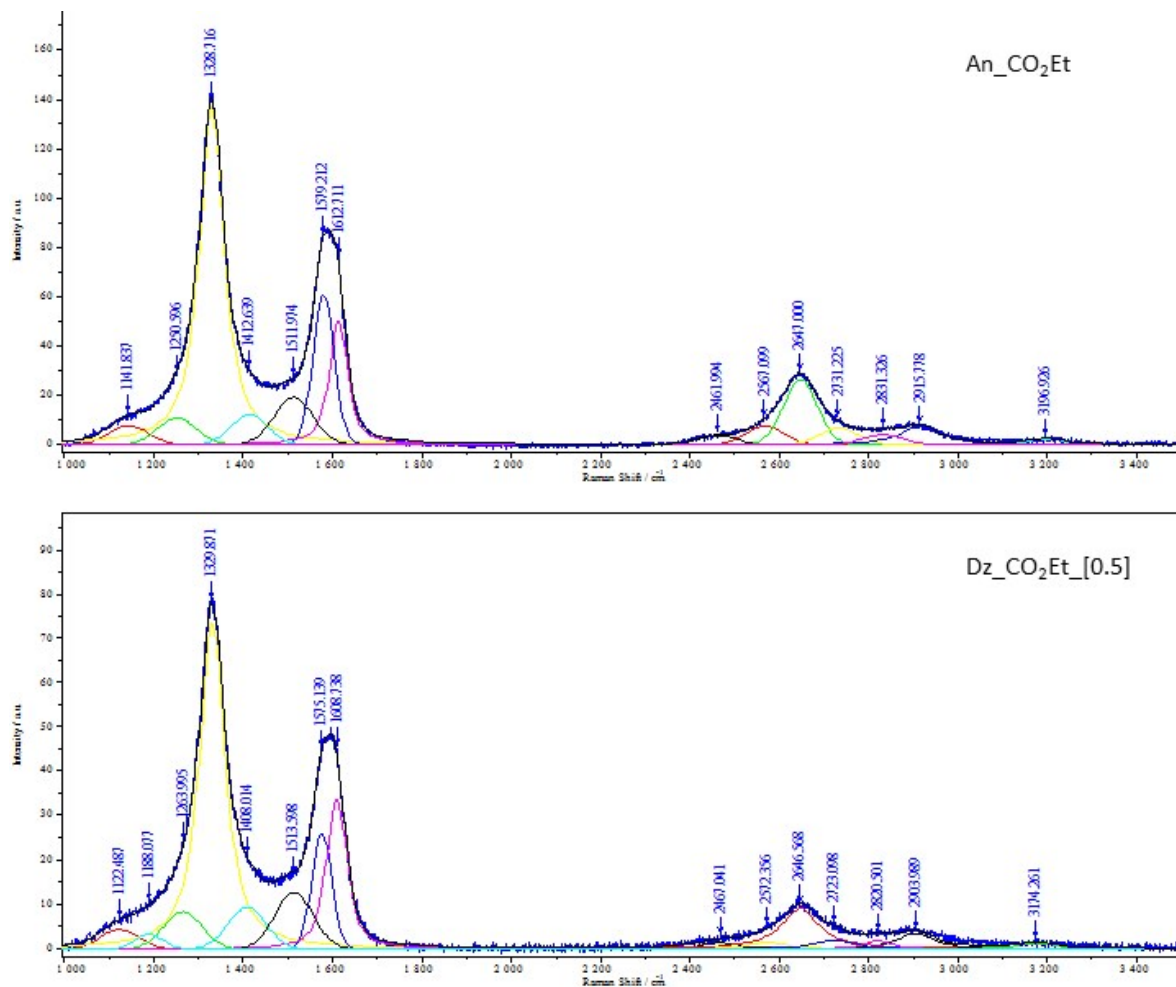

**Figure S1.** Deconvolution pattern of Raman spectra of materials resulting from reaction of MWCNT and 4-ethylaminobenzoate in the presence (material An\_CO₂Et) and absence of isopentyl nitrite (material Dz\_CO₂Et[0.5]).

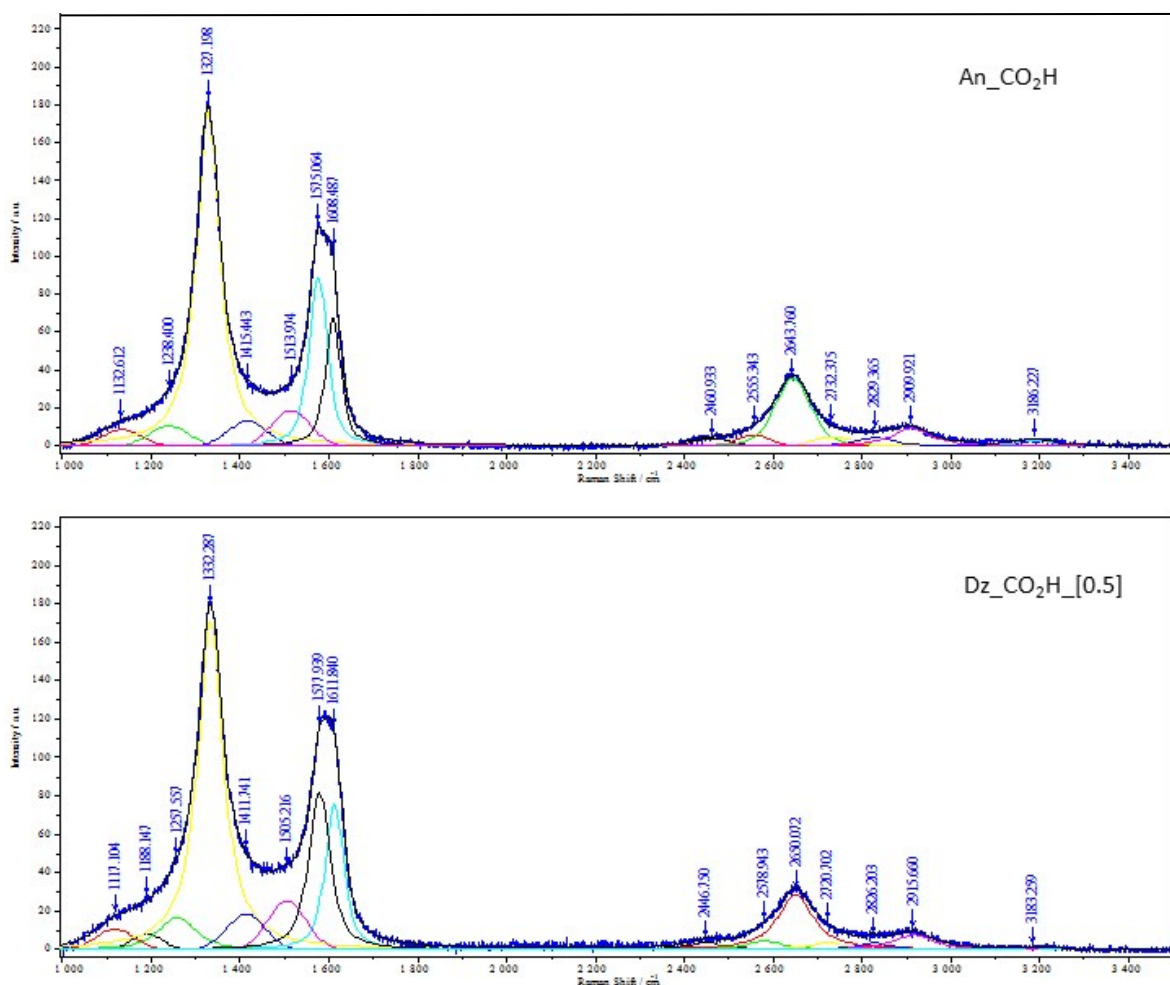

**Figure S2.** Deconvolution pattern of Raman spectra of materials resulting from reaction of MWCNT and 4-aminobenzoic acid in the presence (material An\_CO<sub>2</sub>H) and absence of isopentyl nitrite (material Dz\_CO<sub>2</sub>H[0.5]).

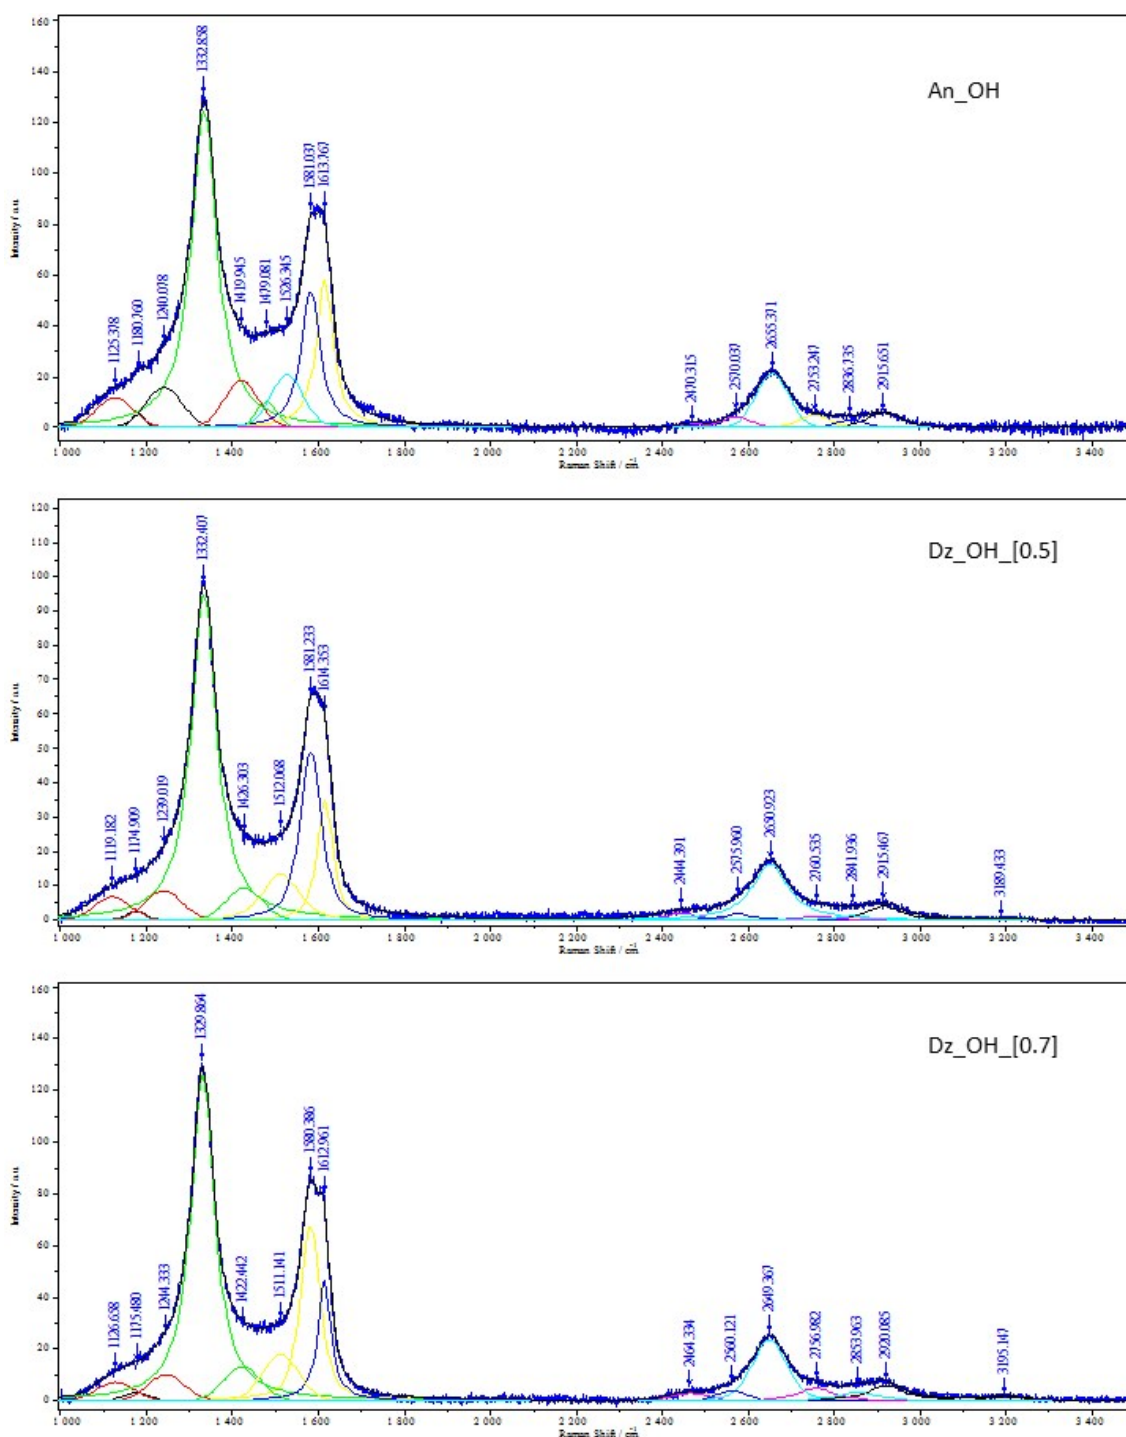

**Figure S3.** Deconvolution pattern of Raman spectra of materials resulting from reaction of MWCNT and 4-hydroxyaniline in the presence (material An\_OH) and absence of isopentyl nitrite (material Dz\_OH[0.7]).

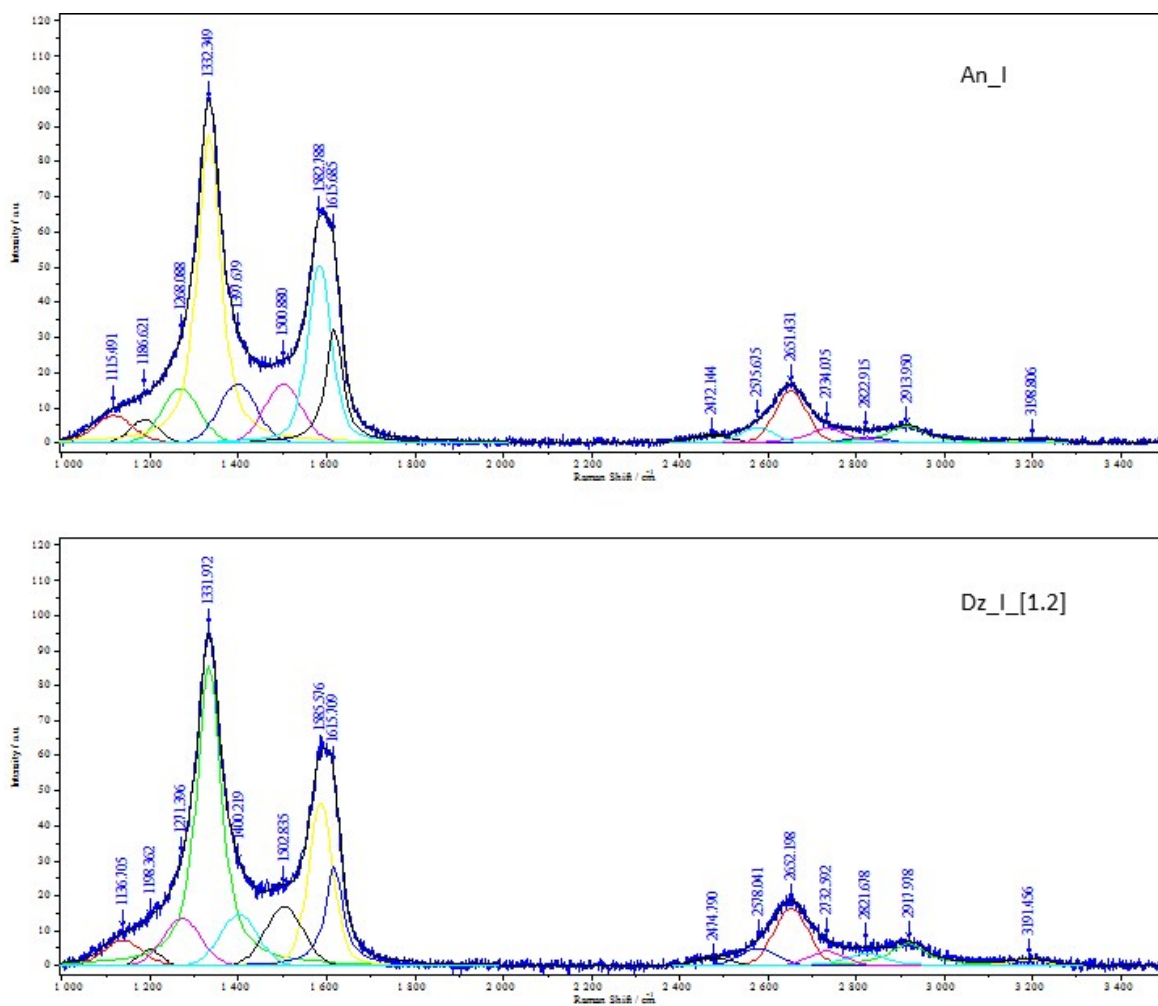

**Figure S4.** Deconvolution pattern of Raman spectra of materials resulting from reaction of MWCNT and 4-iodoaniline in the presence (material An\_I) and absence of isopentyl nitrite (material Dz\_I[1.2]).



### Examples of Raman bands ratios

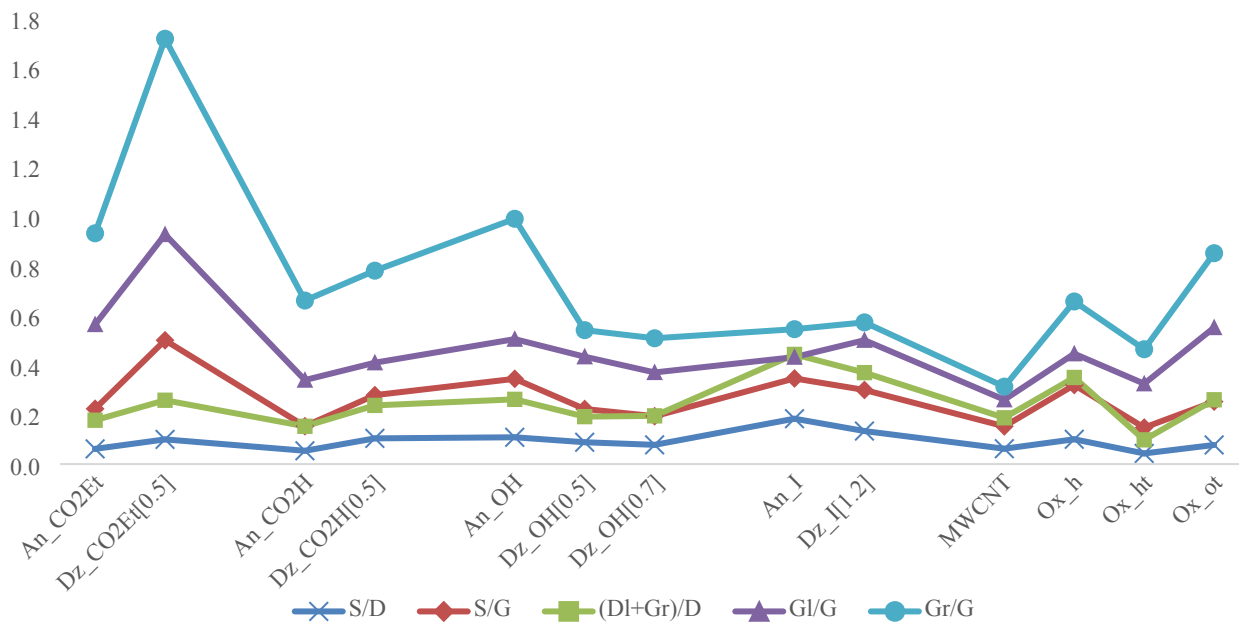

**Figure S5.** Examples of ratios of the Raman bands absolute area (disorder/order) illustrating disorder of the materials.

## Raman spectra data for functional MWCNT (Tables S1-4)

**Table S1.** Relevant Raman data for original and oxidized MWCNT.

| Bands                              | Wavenumber, cm <sup>-1</sup> (Relative areas, %) |        |        |        |        |        |        |        |
|------------------------------------|--------------------------------------------------|--------|--------|--------|--------|--------|--------|--------|
|                                    | Materials                                        |        |        |        |        |        |        |        |
|                                    | MWCNT                                            |        | Ox_h   |        | Ox_ht  |        | Ox_ot  |        |
| <i>1<sup>st</sup> order region</i> |                                                  |        |        |        |        |        |        |        |
| S                                  | 1143.9                                           | (2.9)  | 1122.1 | (3.2)  | 1149.8 | (2.2)  | 1125.5 | (2.0)  |
| Sr                                 | -                                                | (0.0)  | 1186.2 | (0.7)  | -      | (0.0)  | 1179.1 | (0.9)  |
| Dl                                 | 1242.0                                           | (3.2)  | 1259.8 | (8.1)  | 1248.4 | (2.0)  | 1258.1 | (4.8)  |
| D                                  | 1324.1                                           | (46.3) | 1320.9 | (39.1) | 1325.3 | (52.4) | 1323.3 | (38.1) |
| Dr                                 | 1410.7                                           | (5.4)  | 1391.8 | (5.6)  | 1414.8 | (3.1)  | 1395.0 | (5.1)  |
| Gv                                 | -                                                | (0.0)  | -      | (0.0)  | -      | (0.0)  | -      | (0.0)  |
| Gl                                 | 1496.7                                           | (4.9)  | 1503.2 | (5.5)  | 1517.8 | (4.9)  | 1504.6 | (6.4)  |
| G                                  | 1581.3                                           | (18.9) | 1579.4 | (12.3) | 1584.1 | (15.2) | 1578.9 | (11.6) |
| Gr                                 | 1611.1                                           | (5.9)  | 1608.5 | (8.0)  | 1612.2 | (7.1)  | 1611.9 | (9.9)  |
| <i>2<sup>nd</sup> order region</i> |                                                  |        |        |        |        |        |        |        |
| DS                                 | 2494.2                                           | (0.9)  | 2445.6 | (2.0)  | 2447.7 | (2.0)  | 2448.9 | (1.8)  |
| DDl                                | -                                                | (0.0)  | 2563.6 | (1.3)  | -      | (0.0)  | 2573.8 | (1.2)  |
| 2D                                 | 2645.0                                           | (8.5)  | 2637.8 | (8.2)  | 2646.2 | (7.9)  | 2645.1 | (12.5) |
| DDr                                | -                                                | (0.0)  | 2714.9 | (1.5)  | -      | (0.0)  | 2707.6 | (1.3)  |
| DGl                                | 2816.0                                           | (0.7)  | 2822.2 | (1.5)  | 2809.8 | (0.8)  | 2833.2 | (1.1)  |
| DG                                 | 2911.9                                           | (2.4)  | 2914.4 | (3.1)  | 2908.6 | (2.4)  | 2915.9 | (3.2)  |

**Table S2.** Relevant Raman data for MWCNT functionalized with ethyl 4-aminobenzoate and 4-aminobenzoic acid.

| Bands                              | Wavenumber, cm <sup>-1</sup> (Relative areas, %) |        |                            |         |                      |        |                           |        |
|------------------------------------|--------------------------------------------------|--------|----------------------------|---------|----------------------|--------|---------------------------|--------|
|                                    | Materials                                        |        |                            |         |                      |        |                           |        |
|                                    | An_CO <sub>2</sub> Et                            |        | Dz_CO <sub>2</sub> Et[0.5] |         | An_CO <sub>2</sub> H |        | Dz_CO <sub>2</sub> H[0.5] |        |
| <i>1<sup>st</sup> order region</i> |                                                  |        |                            |         |                      |        |                           |        |
| S                                  | 1141.8                                           | (2.6)  | 1122.5                     | (2.6)   | 1132.6               | (2.3)  | 1117.1                    | (2.5)  |
| Sr                                 | -                                                | (0.0)  | 1188.1                     | (1.4)   | -                    | (0.0)  | 1188.2                    | (1.6)  |
| Dl                                 | 1250.6                                           | (3.6)  | 1264.0                     | (4.9)   | 1238.4               | (2.9)  | 1257.6                    | (4.8)  |
| D                                  | 1328.7                                           | (41.9) | 1329.9                     | (40.4)  | 1327.2               | (42.0) | 1332.3                    | (38.7) |
| Dr                                 | 1412.6                                           | (3.8)  | 1408.0                     | (5.5)   | 1415.4               | (3.5)  | 1411.7                    | (4.4)  |
| Gv                                 | -                                                | (0.0)  | -                          | ..(0.0) | -                    | (0.0)  | -                         | (0.0)  |
| Gl                                 | 1512.0                                           | (6.5)  | 1513.6                     | (7.0)   | 1514.0               | (5.0)  | 1505.2                    | (6.4)  |
| G                                  | 1579.2                                           | (11.5) | 1575.1                     | (9.3)   | 1575.1               | (14.7) | 1577.9                    | (13.4) |
| Gr                                 | 1612.7                                           | (10.7) | 1608.7                     | (13.0)  | 1608.5               | (9.7)  | 1611.8                    | (11.8) |
| <i>2<sup>nd</sup> order region</i> |                                                  |        |                            |         |                      |        |                           |        |
| DS                                 | 2462.0                                           | (1.2)  | 2467.0                     | (1.1)   | 2460.9               | (1.0)  | 2446.8                    | (1.2)  |
| DDl                                | 2567.1                                           | (2.4)  | 2572.4                     | (1.2)   | 2555.3               | (1.3)  | 2578.9                    | (1.5)  |
| 2D                                 | 2647.0                                           | (7.8)  | 2646.6                     | (7.5)   | 2643.8               | (10.1) | 2650.1                    | (8.8)  |
| DDr                                | 2731.2                                           | (1.4)  | 2723.1                     | (1.6)   | 2732.4               | (1.3)  | 2720.7                    | (1.2)  |
| DGl                                | 2831.3                                           | (3.6)  | 2820.5                     | (1.0)   | 2829.4               | (1.6)  | 2826.2                    | (1.0)  |
| DG                                 | 2915.8                                           | (1.0)  | 2904.0                     | (2.5)   | 2909.9               | (3.6)  | 2915.7                    | (2.6)  |
| 2G                                 | 3196.9                                           | (0.0)  | 3174.3                     | (1.0)   | 3186.2               | (1.1)  | 3183.3                    | (0.2)  |

**Table S3.** Raman spectral data for MWCNT functionalized with 4-aminophenol.

| Bands                              | Wavenumber, cm <sup>-1</sup> (Relative areas, %) |        |            |        |            |        |
|------------------------------------|--------------------------------------------------|--------|------------|--------|------------|--------|
|                                    | Materials                                        |        |            |        |            |        |
|                                    | An_OH                                            |        | Dz_OH[0.5] |        | Dz_OH[0.7] |        |
| <i>1<sup>st</sup> order region</i> |                                                  |        |            |        |            |        |
| S                                  | 1125.4                                           | (3.7)  | 1119.2     | (2.9)  | 1126.7     | (2.4)  |
| Sr                                 | 1180.8                                           | (0.6)  | 1174.9     | (0.6)  | 1175.5     | (0.7)  |
| Dl                                 | 1240.1                                           | (5.5)  | 1239.0     | (3.9)  | 1244.3     | (3.7)  |
| D                                  | 1332.9                                           | (39.5) | 1332.4     | (40.6) | 1329.9     | (40.6) |
| Dr                                 | 1419.9                                           | (5.6)  | 1426.3     | (3.9)  | 1422.4     | (4.2)  |
| Gv                                 | 1479.1                                           | (1.8)  | -          | (0.0)  | -          | (0.0)  |
| Gl                                 | 1526.4                                           | (6.3)  | 1512.1     | (7.0)  | 1511.1     | (6.0)  |
| G                                  | 1581.0                                           | (12.6) | 1581.2     | (16.1) | 1580.4     | (16.3) |
| Gr                                 | 1613.8                                           | (12.5) | 1614.4     | (8.7)  | 1613.0     | (8.3)  |
| <i>2<sup>nd</sup> order region</i> |                                                  |        |            |        |            |        |
| DS                                 | 2470.3                                           | (0.4)  | 2456.4     | (1.2)  | 2464.3     | (1.0)  |
| DDl                                | 2570.0                                           | (1.2)  | 2576.0     | (1.1)  | 2560.1     | (1.0)  |
| 2D                                 | 2655.4                                           | (6.0)  | 2650.9     | (9.9)  | 2649.4     | (8.4)  |
| DDr                                | 2753.3                                           | (1.4)  | 2760.5     | (0.7)  | 2757.0     | (2.1)  |
| DGl                                | 2836.7                                           | (0.8)  | 2841.9     | (0.9)  | 2854.0     | (1.6)  |
| DG                                 | 2915.7                                           | (2.2)  | 2915.5     | (2.4)  | 2920.1     | (2.8)  |
| 2G                                 | -                                                | (0.0)  | 3189.4     | (0.1)  | 3195.2     | (0.7)  |

**Table S4.** Raman spectral data for MWCNT functionalized with 4-iodoaniline.

| Bands                              | Wavenumber, cm <sup>-1</sup> (Relative areas, %) |        |           |        |
|------------------------------------|--------------------------------------------------|--------|-----------|--------|
|                                    | Materials                                        |        |           |        |
|                                    | An_I                                             |        | Dz_I[1.2] |        |
| <i>1<sup>st</sup> order region</i> |                                                  |        |           |        |
| S                                  | 1115.5                                           | (3.7)  | 1136.7    | (3.3)  |
| Sr                                 | 1186.6                                           | (2.2)  | 1198.4    | (1.2)  |
| Dl                                 | 1268.1                                           | (6.7)  | 1271.4    | (5.9)  |
| D                                  | 1332.4                                           | (31.9) | 1332.4    | (33.6) |
| Dr                                 | 1397.7                                           | (7.4)  | 1400.2    | (6.5)  |
| Gv                                 | -                                                | (0.0)  | -         | (0.0)  |
| Gl                                 | 1500.9                                           | (8.3)  | 1502.8    | (7.3)  |
| G                                  | 1582.8                                           | (15.1) | 1585.6    | (15.5) |
| Gr                                 | 1615.7                                           | (10.0) | 1615.7    | (8.3)  |
| <i>2<sup>nd</sup> order region</i> |                                                  |        |           |        |
| DS                                 | 2472.1                                           | (0.9)  | 2474.8    | (0.9)  |
| DDl                                | 2575.7                                           | (1.7)  | 2578.0    | (2.1)  |
| 2D                                 | 2651.4                                           | (5.5)  | 2652.2    | (6.6)  |
| DDr                                | 2734.1                                           | (2.5)  | 2732.6    | (1.8)  |
| DGl                                | 2822.9                                           | (0.7)  | 2821.7    | (2.1)  |
| DG                                 | 2914.0                                           | (3.0)  | 2918.0    | (4.0)  |
| 2G                                 | 3198.8                                           | (0.6)  | 3191.5    | (1.0)  |
